# Supplementary material for: Lung function tracking in children with perinatally acquired HIV following early antiretroviral therapy initiation
Source: PubMed Central journal article supplement (PMC10715541; doi:10.1136/thorax-2023-220197), 2023-07-21
Supplement: thorax-2023-220197supp001.pdf [file thorax-2023-220197supp001.pdf]

### Supplementary data:

#### Supplementary data

For all tables and figures the following abbreviations are used;

CHIV: Children living with perinatally-acquired HIV

CHEU: Children who are HIV exposed uninfected

CHU: Children who are HIV unexposed

### Supplementary figure 1: Directed Acyclic Graph (DAG) diagram to determine potential confounders.

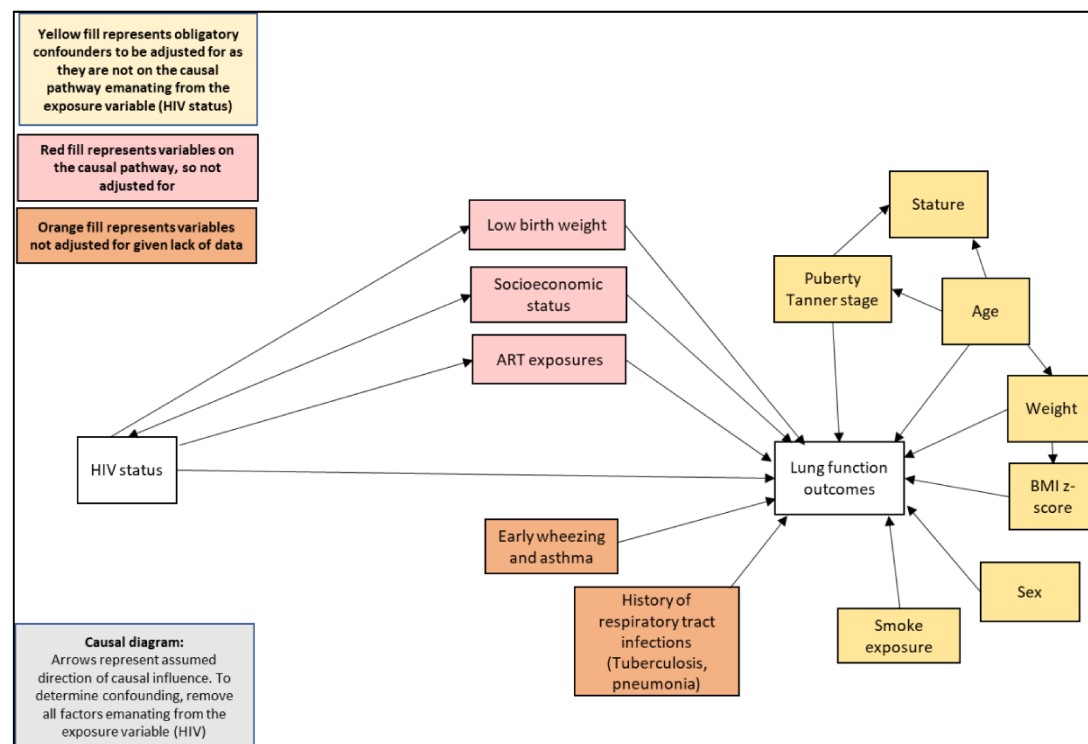

Supplementary Figure 2: Proportion of CHIV with viral suppression by age band.

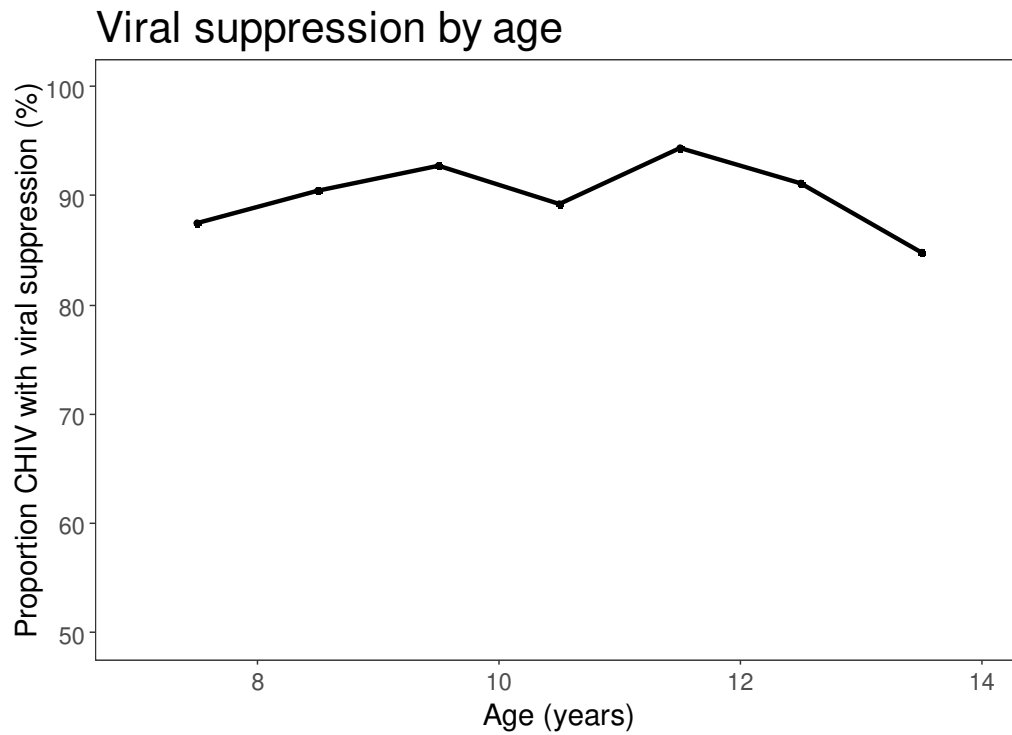

CHIV: Children living with perinatally-acquired HIV. HIV viral suppression was defined as an HIV viral load of  $<400$  copies.mL<sup>-1</sup>. A child is defined as suppressed if their viral load is undetectable for all viral load measurements in that age band.

Supplementary Figure 3: Effect display for the interaction of HIV group and age in the linear mixed model for TLC z-score

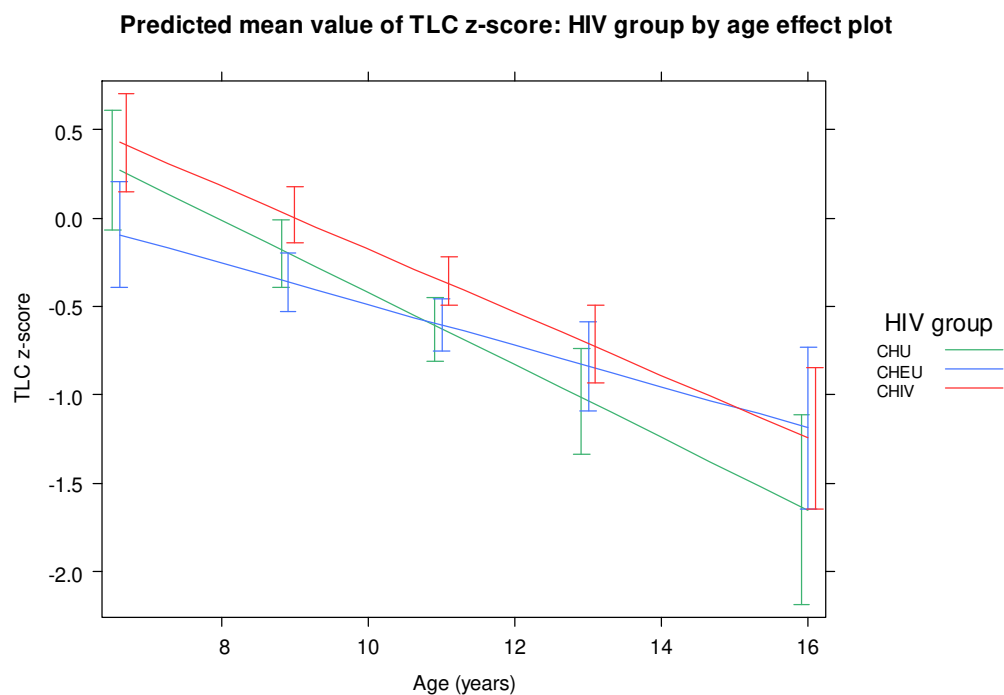

This figure is a graphical depiction of the terms from the linear mixed model, after adjusting for age, height, weight, BMI z-score, Tanner stage, and the interaction between HIV group and age. The figure has been constructed using the Effects package in R, and therefore the analysis only reflects the fixed effects of the model (not random effects) and assumes that other variables in the model are constant and take on their average values. The graphs are constructed using one random dataset from a set of 10 datasets constructed using multiple imputation, and the results do not differ across imputations. 95% Confidence intervals are shown, with standard errors computed from the covariance matrix of the fitted regression coefficients.

Supplementary Figure 4: Effect display for the interaction of HIV group and gender in the linear mixed model for VA z-score

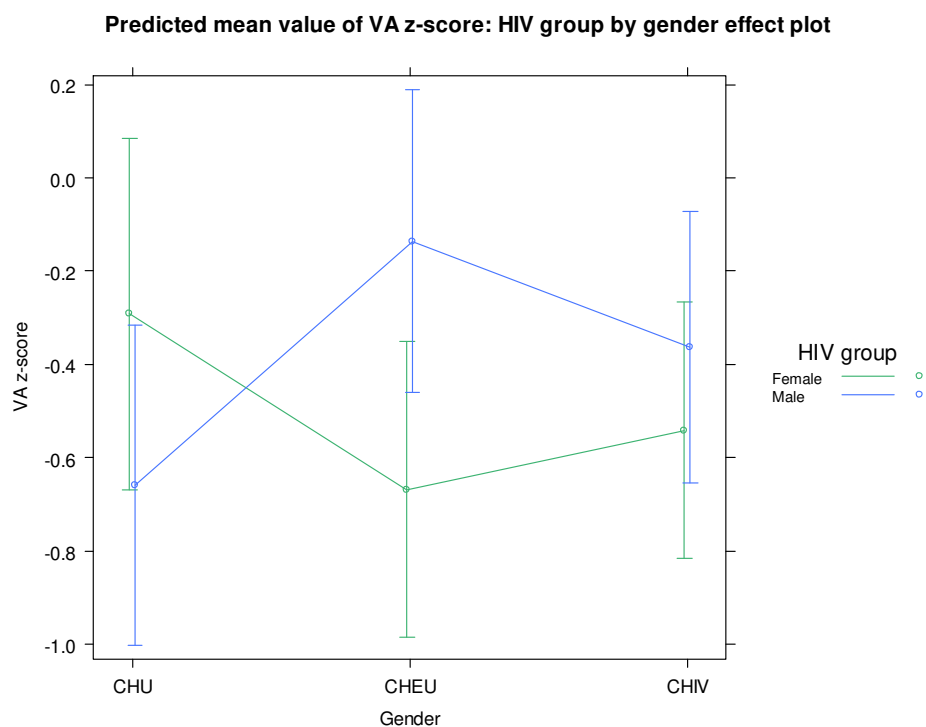

This figure is a graphical depiction of the terms from the linear mixed model, after adjusting for gender, height, weight, cotinine group, and the interaction between HIV group and gender. The figure has been constructed using the Effects package in R, and therefore the analysis only reflects the fixed effects of the model (not random effects) and assumes that other variables in the model are constant and take on their average values. 95% Confidence intervals are shown, with standard errors computed from the covariance matrix of the fitted regression coefficients.

Supplementary table 1: Ethnicity analysis

|          | Black children only                 | Mixed children only   | Combined                           |
|----------|-------------------------------------|-----------------------|------------------------------------|
| FEV1     |                                     |                       |                                    |
| CHIV     | 0.23 (-0.04 to 0.50)                | -0.44 (-1.07 to 0.20) | -0.01 (-0.37 to 0.35) <sup>1</sup> |
| CHEU     | 0.03 (-0.25 to 0.30)                | -0.44 (-1.12 to 0.24) | -0.24 (-0.63 to 0.13)              |
| FVC      |                                     |                       |                                    |
| CHIV     | 0.15 (-0.13 to 0.43)                | -0.20 (-0.84 to 0.44) | 0.05 (-0.20 to 0.31)               |
| CHEU     | -0.10 (-0.39 to 0.19)               | -0.40 (-1.08 to 0.29) | -0.21 (-0.47 to 0.06)              |
| FEV1/FVC |                                     |                       |                                    |
| CHIV     | 0.14 (-0.16 to 0.43)                | -0.48 (-1.01 to 0.06) | -0.00 (-0.24 to 0.24)              |
| CHEU     | 0.26 (-0.04 to 0.55)                | -0.20 (-0.77 to 0.38) | 0.11 (-0.14 to 0.36)               |
| DLCO     |                                     |                       |                                    |
| CHIV     | 0.03 (-0.24 to 0.31)                | -0.26 (-1.07 to 0.55) | 0.03 (-0.23 to 0.28)               |
| CHEU     | 0.03 (-0.26 to 0.32)                | -0.31 (-1.06 to 0.44) | 0.08 (-0.19 to 0.36)               |
| VA       |                                     |                       |                                    |
| CHIV     | -0.26 (-0.72 to -0.19) <sup>2</sup> | -0.60 (-1.24 to 0.04) | -0.30 (-0.65 to 0.06) <sup>2</sup> |
| CHEU     | <b>-0.42 (-0.89 to -0.12)</b>       | -0.21 (-0.82 to 0.41) | <b>-0.47 (-0.84 to -0.10)</b>      |
| TLC      |                                     |                       |                                    |
| CHIV     | 0.11 (-0.94 to 0.72) <sup>3</sup>   | 0.09 (-0.29 to 0.48)  | <b>0.21 (0.03 to 0.40)</b>         |
| CHEU     | <b>-1.02 (-1.93 to -0.12)</b>       | -0.14 (-0.57 to 0.30) | -0.06 (-0.25 to 0.12)              |
| RV       |                                     |                       |                                    |
| CHIV     | <b>0.17 (0.01 to 0.33)</b>          | 0.14 (-0.19 to 0.47)  | <b>0.19 (0.06 to 0.32)</b>         |
| CHEU     | 0.09 (-0.08 to 0.25)                | -0.08 (-0.47 to 0.30) | 0.10 (-0.04 to 0.24)               |
| RV/TLC   |                                     |                       |                                    |
| CHIV     | 0.11 (-0.09 to 0.31)                | 0.21 (-0.21 to 0.62)  | 0.11 (-0.07 to 0.29)               |
| CHEU     | 0.14 (-0.07 to 0.35)                | -0.06 (-0.53 to 0.41) | 0.14 (-0.05 to 0.32)               |

Association between each HIV group and each lung function outcome using linear mixed effects models. The models are based on three datasets: Black children only; Mixed race children only; and the combined dataset. All results are after adjusting for relevant confounders ( $p < 0.20$ ) and after multiple imputation. Only the results for the HIV group variable are displayed, with results showing the mean difference (with 95% CI) in z-score between the exposed group (CHIV or CHEU) and the unexposed group, CHU. Results highlighted in bold indicate significant results.

1. Interaction between HIV group and ethnicity, and interaction between HIV group and gender significant
2. Interaction between HIV group and gender significant
3. Interaction between HIV group and age significant

Supplementary Table 2: Baseline lung function

|                                           | CHIV<br>(n = 122) | CHEU<br>(n = 126) | CHU<br>(n = 80) | p-value |
|-------------------------------------------|-------------------|-------------------|-----------------|---------|
| <b>Spirometry</b>                         |                   |                   |                 |         |
| FEV1 z-score - mean (SD)                  | -0.64 (1.06)      | -0.83 (1.14)      | -0.85 (1.03)    | 0.285   |
| FVC z-score - mean (SD)                   | -0.76 (1.16)      | -1.00 (1.19)      | -0.87 (0.99)    | 0.254   |
| FEV <sub>1</sub> /FVC z-score - mean (SD) | 0.22 (1.08)       | 0.30 (1.22)       | 0.00 (1.26)     | 0.21    |
| <b>Plethysmography</b>                    |                   |                   |                 |         |
| TLC z-score - mean (SD)                   | 0.23 (0.97)       | -0.37 (0.94)      | -0.26 (1.03)    | <0.001  |
| RV z-score - mean (SD)                    | 0.94 (0.65)       | 0.66 (0.74)       | 0.60 (0.75)     | 0.001   |
| RV/TLC z-score - mean (SD)                | 1.73 (0.81)       | 1.50 (0.94)       | 1.39 (0.84)     | 0.02    |
| VC z-score - mean (SD)                    | -2.18 (1.04)      | -2.37 (1.04)      | -2.20 (0.86)    | 0.297   |
| <b>Diffusing capacity:</b>                |                   |                   |                 |         |
| DLCO z-score - mean (SD)                  | 0.27 (0.93)       | 0.13 (1.28)       | 0.15 (0.99)     | 0.664   |
| V <sub>A</sub> z-score - mean (SD)        | -0.25 (0.92)      | -0.41 (1.24)      | -0.54 (1.07)    | 0.261   |

Baseline lung function as at the first successful spirometry, plethysmography, and diffusing capacity maneuver. Mean (SD), and p-values (F-test) are reported.

Supplementary Table 3: FEV<sub>1</sub>

Association between each HIV group and FEV<sub>1</sub> z-score using linear mixed effects model.

Unadjusted estimates show single-predictor analysis of each variable on FEV<sub>1</sub> z-score.

Adjusted results show the mean difference (with 95% CI) in FEV<sub>1</sub> z-score between the exposed group (CHIV/CHEU) and the unexposed group, CHU.

| Predictors                              | Unadjusted Estimate<br>(95% CI) | p-value | Adjusted Estimate<br>(95% CI) | p-value |
|-----------------------------------------|---------------------------------|---------|-------------------------------|---------|
| CHIV (vs CHUU)                          | 0.18 (-0.1 to 0.45)             | 0.204   | 0.23 (-0.04 to 0.50)          | 0.092   |
| CHEU (vs CHUU)                          | 0.02 (-0.26 to 0.3)             | 0.869   | 0.03 (-0.25 to 0.30)          | 0.851   |
| Sex: Male                               | 0.18 (-0.04 to 0.39)            | 0.103   | 0.2 (-0.01 to 0.41)           | 0.063   |
| Age (per year)                          | -0.06 (-0.09 to -0.03)          | <0.001  | -0.05 (-0.08 to -0.02)        | 0.003   |
| Height (per 1cm increase)               | -0.01 (-0.01 to 0)              | 0.004   | -                             | -       |
| Weight (per 1kg increase)               | -0.01 (-0.01 to 0)              | 0.092   | -                             | -       |
| BMI z-score                             | 0.09 (0.01 to 0.18)             | 0.028   | 0.1 (0.02 to 0.18)            | 0.021   |
| Cotinine group: <10ng/mL<br>(reference) | -                               | -       | -                             | -       |
| 11-30ng/mL                              | -0.06 (-0.32 to 0.2)            | 0.641   | -                             | -       |
| 30-100 ng/mL                            | -0.11 (-0.44 to 0.23)           | 0.535   | -                             | -       |
| >100 ng/mL                              | -0.47 (-1.14 to 0.21)           | 0.173   | -                             | -       |
| Tanner stage 1: reference               | -                               | -       | -                             | -       |
| Tanner stage (II vs. I)                 | -0.27 (-0.45 to -0.09)          | 0.003   | -                             | -       |
| Tanner stage (III vs. I)                | -0.08 (-0.31 to 0.15)           | 0.487   | -                             | -       |
| Tanner stage(IV vs. I)                  | -0.17 (-0.68 to 0.35)           | 0.526   | -                             | -       |
| Tanner stage (V vs. I)                  | -0.76 (-2.81 to 1.29)           | 0.465   | -                             | -       |

Results show the adjusted differences in z-scores between HIV groups. The model with random intercept only was optimal. Multi-predictor analysis is shown after adjusting for sex, age and BMI z-score.

CHU: Children who are HIV unexposed; CHEU: Children who are HIV exposed uninfected;

CHIV: Children with perinatally-acquired HIV

Supplementary Table 4: FVC

Association between each HIV group and FVC z-score using linear mixed effects model.

Unadjusted estimates show single-predictor analysis of each variable on FVC z-score.

Adjusted results show the mean difference (with 95% CI) in FVC z-score between the exposed group (CHIV/CHEU) and the unexposed group, CHU.

| Predictors                              | Unadjusted Estimate<br>(95% CI) | p-value | Adjusted Estimate<br>(95% CI) | p-value |
|-----------------------------------------|---------------------------------|---------|-------------------------------|---------|
| CHIV (vs CHUU)                          | 0.13 (-0.15 to 0.42)            | 0.360   | 0.15 (-0.13 to 0.43)          | 0.295   |
| CHEU (vs CHUU)                          | -0.10 (-0.39 to 0.19)           | 0.491   | -0.1 (-0.39 to 0.19)          | 0.495   |
| Sex: Male                               | 0.06 (-0.16 to 0.29)            | 0.577   | -                             | -       |
| Age (per year)                          | -0.02 (-0.05 to 0.01)           | 0.259   | 0.06 (-0.02 to 0.15)          | 0.144   |
| Height (per 1cm increase)               | 0.00 (-0.01 to 0.00)            | 0.143   | -0.01 (-0.03 to 0.00)         | 0.063   |
| Weight (per 1kg increase)               | 0.00 (-0.01 to 0.01)            | 0.718   | -                             | -       |
| BMI z-score                             | 0.13 (0.04 to 0.22)             | 0.003   | 0.17 (0.08 to 0.27)           | <0.001  |
| Cotinine group: <10ng/mL<br>(reference) | -                               | -       | -                             | -       |
| 11-30ng/mL                              | -0.16 (-0.43 to 0.11)           | 0.252   | -0.19 (-0.46 to 0.08)         | 0.103   |
| 30-100 ng/mL                            | -0.04 (-0.39 to 0.31)           | 0.804   | 0.01 (-0.34 to 0.37)          |         |
| >100 ng/mL                              | -0.77 (-1.47 to -0.06)          | 0.033   | -0.73 (-1.40 to -0.05)        |         |
| Tanner stage 1: reference               | -                               | -       | -                             | -       |
| Tanner stage (II vs. I)                 | -0.22 (-0.41 to -0.03)          | 0.026   | -                             | -       |
| Tanner stage (III vs. I)                | 0.03 (-0.22 to 0.28)            | 0.827   | -                             | -       |
| Tanner stage(IV vs. I)                  | 0.12 (-0.43 to 0.68)            | 0.662   | -                             | -       |
| Tanner stage (V vs. I)                  | -0.85 (-3.05 to 1.35)           | 0.446   | -                             | -       |

Results show the adjusted differences in z-scores between HIV groups. The model with random intercept only was optimal. Multi-predictor analysis is shown after adjusting for age, height, BMI z-score and cotinine group.

CHU: Children who are HIV unexposed; CHEU: Children who are HIV exposed uninfected;

CHIV: Children living with perinatally-acquired HIV



Supplementary Table 5: FEV1/FVC z-score

Association between each HIV group and FEV1/FVC z-score using linear mixed effects model. Unadjusted estimates show single-predictor analysis of each variable on FEV1/FVC z-score. Adjusted results show the mean difference (with 95% CI) in FEV1/FVC z-score between the exposed group (CHIV/CHEU) and the unexposed group, CHU.

| Predictors                           | Unadjusted Estimate (95% CI) | p-value | Adjusted Estimate (95% CI) | p-value |
|--------------------------------------|------------------------------|---------|----------------------------|---------|
| CHIV (vs CHUU)                       | 0.09 (-0.21 to 0.39)         | 0.552   | 0.14 (-0.16 to 0.43)       | 0.362   |
| CHEU (vs CHUU)                       | 0.23 (-0.08 to 0.54)         | 0.141   | 0.26 (-0.04 to 0.55)       | 0.092   |
| Sex: Male                            | 0.28 (0.05 to 0.51)          | 0.018   | 0.25 (-0.02 to 0.48)       | 0.033   |
| Age (per year)                       | -0.09 (-0.13 to -0.05)       | <0.001  | -0.20 (-0.28 to -0.12)     | <0.001  |
| Height (per 1cm increase)            | -0.01 (-0.02 to 0)           | 0.006   | 0.04 (0.02 to 0.06)        | <0.001  |
| Weight (per 1kg increase)            | -0.02 (-0.03 to -0.01)       | <0.001  | -0.03 (-0.05 to -0.01)     | 0.002   |
| BMI z-score                          | -0.07 (-0.17 to 0.03)        | 0.164   | -                          | -       |
| Cotinine group: <10ng/mL (reference) | -                            | -       | -                          | -       |
| 11-30ng/mL                           | 0.13 (-0.16 to 0.42)         | 0.384   | -                          | -       |
| 30-100 ng/mL                         | -0.12 (-0.49 to 0.25)        | 0.523   | -                          | -       |
| >100 ng/mL                           | 0.47 (-0.27 to 1.22)         | 0.212   | -                          | -       |
| Tanner stage 1: reference            | -                            | -       | -                          | -       |
| Tanner stage (II vs. I)              | -0.16 (-0.39 to 0.06)        | 0.159   | -                          | -       |
| Tanner stage (III vs. I)             | -0.23 (-0.52 to 0.06)        | 0.114   | -                          | -       |
| Tanner stage(IV vs. I)               | -0.63 (-1.26 to -0.01)       | 0.045   | -                          | -       |
| Tanner stage (V vs. I)               | -0.22 (-2.54 to 2.09)        | 0.850   | -                          | -       |

Results show the adjusted differences in z-scores between HIV groups. The model with random intercept only was optimal. Multi-predictor analysis is shown after adjusting for sex, age, height, weight, and BMI z-score.

CHU: Children who are HIV unexposed; CHEU: Children who are HIV exposed uninfected;

CHIV: Children living with perinatally-acquired HIV

Supplementary Table 6: TLC z-score

Association between each HIV group and TLC z-score using linear mixed effects model.

Unadjusted estimates show single-predictor analysis of each variable on TLC z-score.

Adjusted results show the mean difference (with 95% CI) in TLC z-score between the exposed group (CHIV/CHEU) and the unexposed group, CHU.

| Predictors                           | Unadjusted Estimate (95% CI) | p-value | Adjusted Estimate (95% CI) | p-value |
|--------------------------------------|------------------------------|---------|----------------------------|---------|
| CHIV (vs CHUU)                       | 0.34 (0.12 to 0.57)          | 0.003   | -0.11 (-0.94 to 0.72)      | 0.794   |
| CHEU (vs CHUU)                       | -0.06 (-0.29 to 0.18)        | 0.636   | -1.02 (-1.93 to -0.12)     | 0.026   |
| Sex: Male                            | 0.03 (-0.15 to 0.21)         | 0.737   |                            |         |
| Age (per year, centred at the mean)  | -0.27 (-0.29 to -0.24)       | <0.001  | -0.2 (-0.29 to -0.12)      | <0.001  |
| Height (per 1cm increase)            | -0.05 (-0.05 to -0.04)       | <0.001  | -0.04 (-0.05 to -0.02)     | <0.001  |
| Weight (per 1kg increase)            | -0.04 (-0.05 to -0.04)       | <0.001  | 0.02 (0.01 to 0.03)        | <0.001  |
| BMI z-score                          | 0.08 (0.01 to 0.16)          | 0.032   | -                          | -       |
| Cotinine group: <10ng/mL (reference) | -                            | -       | -                          | -       |
| 11-30ng/mL                           | -0.04 (-0.27 to 0.18)        | 0.698   | -                          | -       |
| 30-100 ng/mL                         | -0.08 (-0.37 to 0.21)        | 0.605   | -                          | -       |
| >100 ng/mL                           | -0.49 (-1.06 to 0.09)        | 0.099   | -                          | -       |
| Tanner stage 1: reference            | -                            | -       | -                          | -       |
| Tanner stage (II vs. I)              | -1.03 (-1.21 to -0.85)       | <0.001  | -0.13 (-0.3 to 0.03)       | 0.017   |
| Tanner stage (III vs. I)             | -0.98 (-1.21 to -0.75)       | <0.001  | 0.14 (-0.11 to 0.39)       |         |
| Tanner stage(IV vs. I)               | -1.08 (-1.57 to -0.59)       | <0.001  | 0.32 (-0.12 to 0.77)       |         |
| Tanner stage (V vs. I)               | -1.74 (-3.56 to 0.09)        | 0.062   | 0.7 (-0.78 to 2.18)        |         |
| Interaction: CHIV*age                |                              |         | 0.03 (-0.04 to 0.11)       | 0.056   |
| Interaction: CHEU*age                |                              |         | 0.09 (0.01 to 0.18)        |         |

Results show the adjusted differences in z-scores between HIV groups. The model with random intercept and random slope with height was optimal. Multi-predictor analysis is shown after adjusting for age, height, weight, Tanner stage, and the interaction between HIV group and age.

CHU: Children who are HIV unexposed; CHEU: Children who are HIV exposed uninfected;

CHIV: Children living with perinatally-acquired HIV

Supplementary Table 7: RV z-score

Association between each HIV group and RV z-score using linear mixed effects model.

Unadjusted estimates show single-predictor analysis of each variable on RV z-score.

Adjusted results show the mean difference (with 95% CI) in RV z-score between the exposed group (CHIV/CHEU) and the unexposed group, CHU.

| Predictors                              | Unadjusted Estimate<br>(95% CI) | p-value | Adjusted Estimate<br>(95% CI) | p-value |
|-----------------------------------------|---------------------------------|---------|-------------------------------|---------|
| CHIV (vs CHUU)                          | 0.25 (0.09 to 0.41)             | 0.003   | 0.17 (0.01 to 0.33)           | 0.042   |
| CHEU (vs CHUU)                          | 0.09 (-0.08 to 0.26)            | 0.322   | 0.09 (-0.08 to 0.25)          | 0.300   |
| Sex: Male                               | -0.16 (-0.29 to -0.03)          | 0.014   | -0.16 (-0.28 to -0.03)        | 0.013   |
| Age (per year)                          | -0.17 (-0.2 to -0.15)           | <0.001  | -0.13 (-0.18 to -0.08)        | <0.001  |
| Height (per 1cm increase)               | -0.03 (-0.03 to -0.02)          | <0.001  | -0.01 (-0.02 to 0.00)         | 0.058   |
| Weight (per 1kg increase)               | -0.03 (-0.03 to -0.02)          | <0.001  |                               |         |
| BMI z-score                             | 0 (-0.06 to 0.05)               | 0.876   |                               |         |
| Cotinine group: <10ng/mL<br>(reference) | -                               | -       | -                             | -       |
| 11-30ng/mL                              | 0.1 (-0.06 to 0.26)             | 0.236   |                               |         |
| 30-100 ng/mL                            | -0.03 (-0.24 to 0.18)           | 0.770   |                               |         |
| >100 ng/mL                              | 0.15 (-0.26 to 0.56)            | 0.474   |                               |         |
| Tanner stage 1: reference               | -                               | -       | -                             | -       |
| Tanner stage (II vs. I)                 | -0.63 (-0.78 to -0.48)          | <0.001  |                               |         |
| Tanner stage (III vs. I)                | -0.63 (-0.82 to -0.44)          | <0.001  |                               |         |
| Tanner stage(IV vs. I)                  | -0.9 (-1.29 to -0.51)           | <0.001  |                               |         |
| Tanner stage (V vs. I)                  | -1.4 (-2.76 to -0.04)           | 0.044   |                               |         |

Results show the adjusted differences in z-scores between HIV groups. The model with random intercept only was optimal. Multi-predictor analysis is shown after adjusting for sex, age and height.

CHU: Children who are HIV unexposed; CHEU: Children who are HIV exposed uninfected;

CHIV: Children living with perinatally-acquired HIV

Supplementary Table 8: RV/TLC z-score

Association between each HIV group and RV/TLC z-score using linear mixed effects model.

Unadjusted estimates show single-predictor analysis of each variable on RV/TLC z-score.

Adjusted results show the mean difference (with 95% CI) in RV/TLC z-score between the exposed group (CHIV/CHEU) and the unexposed group, CHU.

| Predictors                              | Unadjusted Estimate<br>(95% CI) | p-value | Adjusted Estimate<br>(95% CI) | p-value |
|-----------------------------------------|---------------------------------|---------|-------------------------------|---------|
| CHIV (vs CHUU)                          | 0.22 (0.02 to 0.41)             | 0.034   | 0.11 (-0.09 to 0.31)          | 0.296   |
| CHEU (vs CHUU)                          | 0.14 (-0.07 to 0.35)            | 0.198   | 0.14 (-0.07 to 0.35)          | 0.188   |
| Sex: Male                               | 0.03 (-0.13 to 0.18)            | 0.724   | -                             | -       |
| Age (per year)                          | -0.22 (-0.24 to -0.19)          | <0.001  | -0.16 (-0.22 to -0.09)        | <0.001  |
| Height (per 1cm increase)               | -0.04 (-0.04 to -0.03)          | <0.001  | -0.01 (-0.02 to -0.00)        | 0.040   |
| Weight (per 1kg increase)               | -0.04 (-0.05 to -0.03)          | <0.001  | -                             | -       |
| BMI z-score                             | -0.07 (-0.13 to 0)              | 0.059   | -0.07 (-0.14 to 0.01)         | 0.072   |
| Cotinine group: <10ng/mL<br>(reference) | -                               | -       | -                             | -       |
| 11-30ng/mL                              | 0.16 (-0.03 to 0.36)            | 0.102   | 0.14 (-0.05 to 0.33)          | 0.181   |
| 30-100 ng/mL                            | 0 (-0.25 to 0.26)               | 0.970   | 0.12 (-0.14 to 0.37)          |         |
| >100 ng/mL                              | 0.47 (-0.03 to 0.97)            | 0.068   | 0.42 (-0.07 to 0.91)          |         |
| Tanner stage 1: reference               | -                               | -       | -                             | -       |
| Tanner stage (II vs. I)                 | -0.74 (-0.92 to -0.56)          | <0.001  | -                             | -       |
| Tanner stage (III vs. I)                | -0.84 (-1.06 to -0.61)          | <0.001  | -                             | -       |
| Tanner stage(IV vs. I)                  | -1.2 (-1.67 to -0.74)           | <0.001  | -                             | -       |
| Tanner stage (V vs. I)                  | -1.59 (-3.24 to 0.06)           | 0.059   | -                             | -       |

Results show the adjusted differences in z-scores between HIV groups. The model with random intercept only was optimal. Multi-predictor analysis is shown after adjusting for height, age, BMI z-score and cotinine group.

CHU: Children who are HIV unexposed; CHEU: Children who are HIV exposed uninfected;

CHIV: Children living with perinatally-acquired HIV

Supplementary Table 9: VC z-score

Association between each HIV group and VC z-score using linear mixed effects model.

Unadjusted estimates show single-predictor analysis of each variable on VC z-score.

Adjusted results show the mean difference (with 95% CI) in VC z-score between the exposed group (CHIV/CHEU) and the unexposed group, CHU.

| Predictors                              | Unadjusted Estimate<br>(95% CI) | p-value | Adjusted Estimate<br>(95% CI) | p-value |
|-----------------------------------------|---------------------------------|---------|-------------------------------|---------|
| CHIV (vs CHUU)                          | 0.09 (-0.17 to 0.34)            | 0.493   | 0.19 (-0.06 to 0.44)          | 0.134   |
| CHEU (vs CHUU)                          | -0.15 (-0.41 to 0.11)           | 0.244   | -0.11 (-0.37 to 0.15)         | 0.406   |
| Sex: Male                               | 0.21 (0.02 to 0.41)             | 0.035   | 0.24 (0.05 to 0.44)           | 0.015   |
| Age (per year)                          | 0.09 (0.06 to 0.12)             | <0.001  | 0.1 (0.06 to 0.13)            | <0.001  |
| Height (per 1cm increase)               | 0.02 (0.01 to 0.02)             | <0.001  |                               |         |
| Weight (per 1kg increase)               | 0.02 (0.02 to 0.03)             | <0.001  |                               |         |
| BMI z-score                             | 0.13 (0.05 to 0.21)             | 0.001   | 0.17 (0.09 to 0.24)           | <0.001  |
| Cotinine group: <10ng/mL<br>(reference) | -                               | -       | -                             | -       |
| 11-30ng/mL                              | -0.28 (-0.52 to -0.03)          | 0.028   | -0.19 (-0.43 to 0.05)         | 0.115   |
| 30-100 ng/mL                            | -0.05 (-0.36 to 0.27)           | 0.764   | -0.03 (-0.34 to 0.29)         |         |
| >100 ng/mL                              | -0.56 (-1.2 to 0.08)            | 0.086   | -0.60 (-1.20 to 0.01)         |         |
| Tanner stage 1: reference               | -                               | -       | -                             | -       |
| Tanner stage (II vs. I)                 | 0.17 (0 to 0.34)                | 0.045   |                               |         |
| Tanner stage (III vs. I)                | 0.4 (0.19 to 0.62)              | <0.001  |                               |         |
| Tanner stage(IV vs. I)                  | 0.51 (0.03 to 0.99)             | 0.038   |                               |         |
| Tanner stage (V vs. I)                  | 0.24 (-1.74 to 2.22)            | 0.812   |                               |         |

Results show the adjusted differences in z-scores between HIV groups. The model with random intercept and random slope with age was optimal. Multi-predictor analysis is shown after adjusting for sex, age, BMI z-score and cotinine group.

CHU: Children who are HIV unexposed; CHEU: Children who are HIV exposed uninfected;

CHIV: Children living with perinatally-acquired HIV

Supplementary Table 10: DLCO z-score

Association between each HIV group and DLCO z-score using linear mixed effects model.

Unadjusted estimates show single-predictor analysis of each variable on DLCO z-score.

Adjusted results show the mean difference (with 95% CI) in DLCO z-score between the exposed group (CHIV/CHEU) and the unexposed group, CHU.

| Predictors                              | Unadjusted Estimate<br>(95% CI) | p-value | Adjusted Estimate<br>(95% CI) | p-value |
|-----------------------------------------|---------------------------------|---------|-------------------------------|---------|
| CHIV (vs CHUU)                          | 0.00 (-0.31 to 0.3)             | 0.994   | 0.03 (-0.24 to 0.31)          | 0.822   |
| CHEU (vs CHUU)                          | -0.02 (-0.34 to 0.3)            | 0.910   | 0.03 (-0.26 to 0.32)          | 0.843   |
| Sex: Male                               | -0.03 (-0.27 to 0.21)           | 0.827   |                               |         |
| Age (per year)                          | -0.09 (-0.15 to -0.04)          | 0.001   | -0.12 (-0.18 to -0.05)        | <0.001  |
| Height (per 1cm increase)               | -0.02 (-0.03 to -0.01)          | 0.001   |                               |         |
| Weight (per 1kg increase)               | -0.01 (-0.02 to 0)              | 0.094   |                               |         |
| BMI z-score                             | 0.07 (-0.03 to 0.17)            | 0.183   |                               |         |
| Cotinine group: <10ng/mL<br>(reference) | -                               | -       | -                             | -       |
| 11-30ng/mL                              | 0.03 (-0.27 to 0.34)            | 0.821   |                               |         |
| 30-100 ng/mL                            | 0.16 (-0.23 to 0.55)            | 0.413   |                               |         |
| >100 ng/mL                              | -0.07 (-0.99 to 0.85)           | 0.879   |                               |         |
| Tanner stage 1: reference               | -                               | -       | -                             | -       |
| Tanner stage (II vs. I)                 | -0.47 (-0.78 to -0.16)          | 0.003   |                               |         |
| Tanner stage (III vs. I)                | -0.24 (-0.62 to 0.14)           | 0.207   |                               |         |
| Tanner stage(IV vs. I)                  | -0.33 (-0.95 to 0.29)           | 0.297   |                               |         |
| Tanner stage (V vs. I)                  | -1.06 (-3.15 to 1.02)           | 0.316   |                               |         |

Results show the adjusted differences in z-scores between HIV groups. The model with random intercept and random slope with age was optimal. Multi-predictor analysis is shown after adjusting for age.

CHU: Children who are HIV unexposed; CHEU: Children who are HIV exposed uninfected;

CHIV: Children living with perinatally-acquired HIV

Supplementary Table 11: V<sub>A</sub> z-score

Association between each HIV group and V<sub>A</sub> z-score using linear mixed effects model.

Unadjusted estimates show single-predictor analysis of each variable on V<sub>A</sub> z-score. Adjusted results show the mean difference (with 95% CI) in V<sub>A</sub> z-score between the exposed group (CHIV/CHEU) and the unexposed group, CHU.

| Predictors                              | Unadjusted Estimate<br>(95% CI) | p-value | Adjusted Estimate<br>(95% CI) | p-value |
|-----------------------------------------|---------------------------------|---------|-------------------------------|---------|
| CHIV (vs CHUU)                          | 0.17 (-0.15 to 0.49)            | 0.301   | -0.26 (-0.72 to 0.19)         | 0.252   |
| CHEU (vs CHUU)                          | 0.11 (-0.23 to 0.44)            | 0.531   | -0.42 (-0.89 to 0.12)         | 0.080   |
| Sex: Male                               | 0.16 (-0.09 to 0.42)            | 0.215   | -0.35 (-0.84 to 0.13)         | 0.153   |
| Age (per year)                          | -0.16 (-0.21 to -0.11)          | <0.001  |                               |         |
| Height (per 1cm increase)               | -0.03 (-0.04 to -0.02)          | <0.001  | -0.05 (-0.06 to -0.03)        | <0.001  |
| Weight (per 1kg increase)               | -0.03 (-0.04 to -0.01)          | <0.001  | 0.02 (0.00 to 0.04)           | 0.020   |
| BMI z-score                             | 0.04 (-0.06 to 0.15)            | 0.424   |                               |         |
| Cotinine group: <10ng/mL<br>(reference) | -                               | -       | -                             | -       |
| 11-30ng/mL                              | -0.14 (-0.46 to 0.17)           | 0.371   | -0.10 (-0.41 to 0.22)         | 0.177   |
| 30-100 ng/mL                            | 0.23 (-0.18 to 0.64)            | 0.265   | 0.38 (-0.01 to 0.78)          |         |
| >100 ng/mL                              | -0.06 (-0.99 to 0.87)           | 0.894   | -0.00 (-0.89 to 0.89)         |         |
| Tanner stage I: reference               | -                               | -       | -                             | -       |
| Tanner stage (II vs. I)                 | -0.68 (-0.92 to -0.44)          | <0.001  |                               |         |
| Tanner stage (III vs. I)                | -0.63 (-0.96 to -0.3)           | <0.001  |                               |         |
| Tanner stage(IV vs. I)                  | -0.98 (-1.55 to -0.4)           | 0.001   |                               |         |
| Tanner stage (V vs. I)                  | -1.17 (-3.23 to 0.9)            | 0.266   |                               |         |
| Interaction: CHIV*gender<br>(Male)      |                                 |         | 0.53 (-0.10 to 1.15)          | 0.026   |
| Interaction: CHEU*gender<br>(Male)      |                                 |         | 0.87 (0.22 to 1.53)           |         |

Results show the adjusted differences in z-scores between HIV groups. The model with random intercept only was optimal. Multi-predictor analysis is shown after adjusting for gender, height, weight, cotinine group, and the interaction between HIV group and gender.

CHU: Children who are HIV unexposed; CHEU: Children who are HIV exposed uninfected;

CHIV: Children living with perinatally-acquired HIV
